1

2

3

4

5 **Nucleotide excision repair is universally mutagenic and**  
6 **transcription-associated**

7

8

9 Juan Carvajal-Garcia<sup>1</sup>, Ariana N. Samadpour<sup>2</sup>, Angel J. Hernandez Viera<sup>1</sup>, Houra Merrikh<sup>#1</sup>

10

11 <sup>1</sup>Vanderbilt University School of Medicine, Department of Biochemistry, Nashville, TN, USA

12 <sup>2</sup>Department of Microbiology, University of Washington, Seattle, WA, USA

13

14 <sup>#</sup>Corresponding author

15 Email: [houra.merrikh@vanderbilt.edu](mailto:houra.merrikh@vanderbilt.edu)

16

17

18

19

20

21

## 22 **Summary**

23 Nucleotide excision repair (NER) is a highly conserved mechanism that removes lesions from DNA. This  
24 process has been studied for decades, however, almost all of the work on NER was performed in the  
25 presence of exogenous DNA damage. Under these conditions, NER is anti-mutagenic in bacteria. Here,  
26 we describe our findings on the role of NER in mutagenesis under endogenous conditions. Counter to  
27 dogma, we find that NER is actually pro-mutagenic. Our data suggest a hand-off mechanism between  
28 two different types of DNA polymerases that explains the mutagenic nature of NER. Additionally, NER is  
29 thought to occur in two different ways; 1) in a transcription-coupled manner where it plays a role in  
30 removing lesions that block RNA polymerase, and 2) in a process known as global genome NER, which is  
31 independent of transcription. Counter to the classical view, our genetic analyses of the relationship  
32 between NER and the RNA polymerase interacting DNA translocase, and evolvability factor, Mfd,  
33 indicate that most likely all NER is associated with transcription. Lastly, we show that NER is pro-  
34 mutagenic because of endogenous oxidative damage. Altogether, our data strongly suggest that  
35 oxidative damage induces a mutagenic NER mechanism, which then accelerates evolution across  
36 divergent bacterial species.

37

38

## 39 **Main text**

40 Mutations drive evolution. They provide the necessary genetic diversity that natural selection can  
41 then use to help organisms adapt to new environments. Even though mutations are mostly  
42 deleterious, and that lower mutation rates are generally accepted to be beneficial, all organisms  
43 have a baseline mutation rate that allows them to evolve<sup>1</sup>. However, which endogenous  
44 mechanisms most commonly lead to mutations and drive evolution remain poorly understood.

45 We recently determined that the bacterial RNA polymerase interacting protein Mfd, which is  
46 involved in a sub-pathway of the DNA repair pathway nucleotide excision repair (NER),  
47 promotes mutations and leads to rapid antibiotic resistance development across highly divergent  
48 bacteria<sup>2</sup>. This function depended on Mfd's interaction with the NER protein UvrA. These  
49 findings suggested that NER in general might be a mechanism that drives spontaneous  
50 mutagenesis in bacteria, potentially even in the absence of transcription. However, this was a  
51 hypothesis that would go against dogma. The dogmatic view of NER and its role in reducing  
52 mutagenesis was based on a series of studies that utilized artificial DNA damaging conditions.  
53 Most *in vivo* studies on NER to date have been performed in the presence of exogenous DNA  
54 damage such as UV light. These studies led to the conclusion that NER is an anti-mutagenic  
55 DNA repair pathway<sup>3,4</sup>. However, whether this is true in an endogenous context, in  
56 unperturbed cells, in the absence of artificial DNA damaging conditions, has not been  
57 investigated.

58 Bacterial NER consists of four steps: 1) Damage recognition, 2) Strand separation, 3) Damaged  
59 strand cleavage, 4) Damaged oligonucleotide eviction and 5) Fill in synthesis and ligation<sup>5</sup>.  
60 Traditionally, bacterial NER has been thought to consist of two sub pathways that differ only on  
61 the recognition step: in transcription-coupled NER (TCR), a stalled RNA polymerase detects the  
62 DNA lesion and involves Mfd-dependent recruitment of UvrA; in global genome (GG) NER,  
63 lesions are detected by the UvrA dimer and is Mfd independent<sup>5,6</sup>. Downstream of damage  
64 recognition, UvrB separates the strands and guides the UvrC nuclease to cleave the damaged  
65 strand. The damage containing oligo is removed by the UvrD helicase and the pathway is fished  
66 by gap filling DNA synthesis<sup>5</sup>. A recent alternative model for damage recognition during TC-  
67 NER suggests that UvrD instead of Mfd recruits the NER factors and proposes that, in bacteria,  
68 all NER is transcription coupled, although these conclusions remain somewhat controversial<sup>7-10</sup>.

69 Here we show that the core NER factors UvrABC promote spontaneous mutagenesis, across  
70 highly divergent bacterial species. We also show that a replicative polymerase, and two Y-family  
71 polymerases are responsible for the observed NER-dependent increase in mutagenesis. Critically,  
72 our genetic analyses show that all three polymerases function in the same pathway as the NER  
73 proteins and Mfd. These findings strongly suggest that bacterial NER is a pro-mutagenic repair  
74 pathway that is universally coupled to transcription, and that this is due to the usage of error  
75 prone polymerases. Last, we present data that the underlying cause of this process is endogenous  
76 oxidative stress and that in general, oxidative damage drives NER mutagenesis and rapid  
77 evolution in bacteria.

## 78 **NER promotes mutagenesis in bacteria**

79 We and others have previously shown that, in the absence of exogenous DNA damage, the  
80 bacterial transcription-coupled repair (TCR) protein Mfd promotes mutagenesis across many  
81 different bacterial species<sup>2,11,12</sup>. In addition, we previously showed that this pro-mutagenic effect  
82 depends on the interaction of Mfd with the RNA polymerase (RNAP) and the NER protein  
83 UvrA<sup>2</sup>. This brings up the possibility that NER, which is thought to promote genome stability  
84 and reduce mutagenesis<sup>3,4</sup>, is pro-mutagenic in the absence of exogenous DNA damage, in the  
85 endogenous context.

86 We first tested this hypothesis by measuring mutation rates using the Luria-Delbruck fluctuation  
87 assays<sup>13</sup> in wild-type *Bacillus subtilis* strains and isogenic strains that lack each of the NER  
88 proteins: UvrA, UvrB and UvrC. We performed these experiments in the absence of exogenous  
89 DNA damage. Strikingly, we observed a 50-75% decrease in the mutation rates in NER deficient  
90 strains (Fig. 1A).

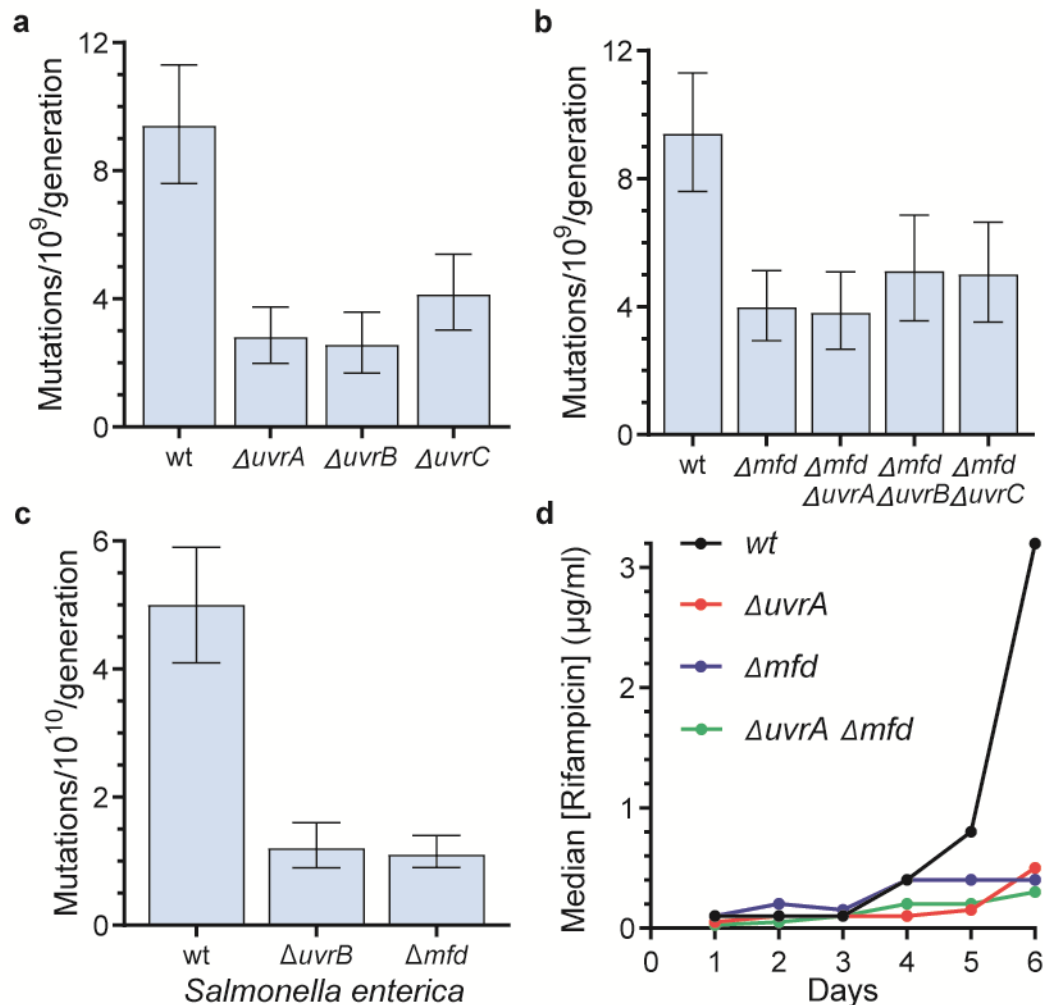

91

92 **Figure 1: a, b)** Mutation rates of *Bacillus subtilis* strains measured using rifampicin. n=54 (wt), 48  
93 ( $\Delta uvrA$ ), 37 ( $\Delta uvrB$ ), 48 ( $\Delta uvrC$ ), 59 ( $\Delta mfd$ ), 40 ( $\Delta mfd \Delta uvrA$ ), 40 ( $\Delta mfd \Delta uvrB$ ), 50 ( $\Delta mfd \Delta uvrC$ )  
94 biological replicates. c) Mutation rates of *Salmonella enterica* serovar Typhimurium strains measured  
95 using rifampicin. n=54 (wt), 40 ( $\Delta uvrB$ ), 48 ( $\Delta mfd$ ). d) Median rifampicin concentration that allows for

96 growth in the indicated strains at the indicated timepoints. n=23 (wt), 24 ( $\Delta uvrA$ ), 12 ( $\Delta mfd$ ), 12 ( $\Delta uvrA$   
97  $\Delta mfd$ ). Error bars are 95% confidence intervals.

98

99 To determine whether the pro-mutagenic effects of NER were due to TCR and/or GG-NER, we  
100 built double mutants that lacked Mfd and the Uvr proteins. If NER is mutagenic due to only  
101 TCR, then we expected that the double mutants lacking Mfd and NER proteins would have an  
102 epistatic relationship, and that the mutation rates of the double mutants would be similar to the  
103 single mutants. On the other hand, if NER-mediated mutagenesis is through both GG-NER and  
104 TCR, the combination of mutants lacking both Mfd and NER proteins would further reduce  
105 mutation rates. To discern between these possibilities, we measured and compared the mutation  
106 rates of the single and double mutants side-by-side. We found that the mutation rates of strains  
107 lacking both Mfd and all three canonical NER factors have the same mutation rates as each  
108 single mutant alone (Fig. 1B). This strongly suggests that all (mutagenic) NER is coupled to  
109 transcription.

110 To determine whether the mutagenic nature of NER is conserved across bacterial species, we  
111 next determined the mutation rates of similar strains in *Salmonella enterica* serovar  
112 Typhimurium, a Gram-negative bacterium which is highly divergent from *B. subtilis*. When we  
113 compared the mutation rates of wild-type strains to those that either lack a Uvr protein or Mfd,  
114 we found results that were consistent with what we observed in *B. subtilis*. In the absence of  
115 UvrB, there was a similar decrease in mutation rates compared to strains lacking Mfd. These  
116 results indicate that, the mutagenicity of NER is conserved amongst bacteria (Fig. 1C).

117 We have shown in the past that, over time, relatively small (in this case a 50-75% decrease)  
118 differences in mutation rates can translate into large differences in the rate of evolution<sup>2</sup>. We  
119 therefore used a laboratory evolution assay we previously established to determine whether the  
120 mutagenic nature of NER accelerates evolution. For this, we measured adaptation to the  
121 transcription inhibitor rifampicin in wild-type strains to those lacking UvrA or Mfd, or both, in  
122 *B. subtilis*<sup>2</sup>. We have previously shown that the increase in the minimal inhibitory concentration  
123 (MIC) observed over time correlates with the appearance of mutations in known resistance  
124 genes<sup>2</sup>. After six days (approximately 40 generations), the median concentration of rifampicin  
125 wild-type cells were able to survive was 3.2  $\mu\text{g/ml}$ , while this was markedly lower for *uvrA* null  
126 (0.4  $\mu\text{g/ml}$ ), *mfd* nulls (0.5  $\mu\text{g/ml}$ ), and *uvrA mfd* double mutants (0.3  $\mu\text{g/ml}$ ) (Fig. 1D). This  
127 indicates that the differences observed in the mutation rates in NER deficient cells are  
128 compounded and ultimately have large effects on adaptive evolution. In addition, these results  
129 support the observation that all mutagenic NER is in the same pathway as Mfd, and again, most  
130 likely universally transcription dependent.

### 131 **A replicative and two Y-family polymerases function in the same pathway as NER**

132 NER is generally thought to be an error free pathway. However, our observations clearly suggest  
133 that this is not the case in the endogenous context. Our data suggest that the gap filling step of  
134 NER is completed by an error-prone mechanism. During NER, gap-filling synthesis is the last  
135 step of the pathway and based on *in vitro* experiments that examined DNA polymerase I (PolA in

136 *B. subtilis*), the dogmatic view became that this is the polymerase that functions during this step<sup>5</sup>.  
137 Thus, we measured mutation rates in cells lacking PolA. Although *in vitro* work had led to the  
138 conclusion that PolA is a high-fidelity polymerase<sup>14</sup>, we found that this is not the case *in vivo*.  
139 We observed that PolA is mutagenic, as cells lacking PolA showed a decrease in mutation rates  
140 that were very similar to that seen in NER deficient strains.

141 To determine whether NER is mutagenic due to PolA activity, we measured the mutation rates of  
142 *uvrA polA* and *mfd polA* double knockouts. When we compared the mutation rates of strains  
143 lacking either PolA, Mfd, or UvrA alone to the double mutants that lacked Mfd and PolA as well  
144 as UvrA and PolA, we did not see an additional decrease in mutation rates, indicating that Mfd-  
145 associated, mutagenic NER is in the same pathway as PolA (Fig. 2A). In addition, we used a  
146 biochemical assay where we purified *B. subtilis* PolA and used an *in vitro* primer-extension  
147 assay on a ssDNA gap template similar to the one that would be generated during NER to re-  
148 examine whether PolA can fill in this gap. We indeed observed that PolA is able to efficiently fill  
149 in this gap (Extended Data Fig 1A, B).

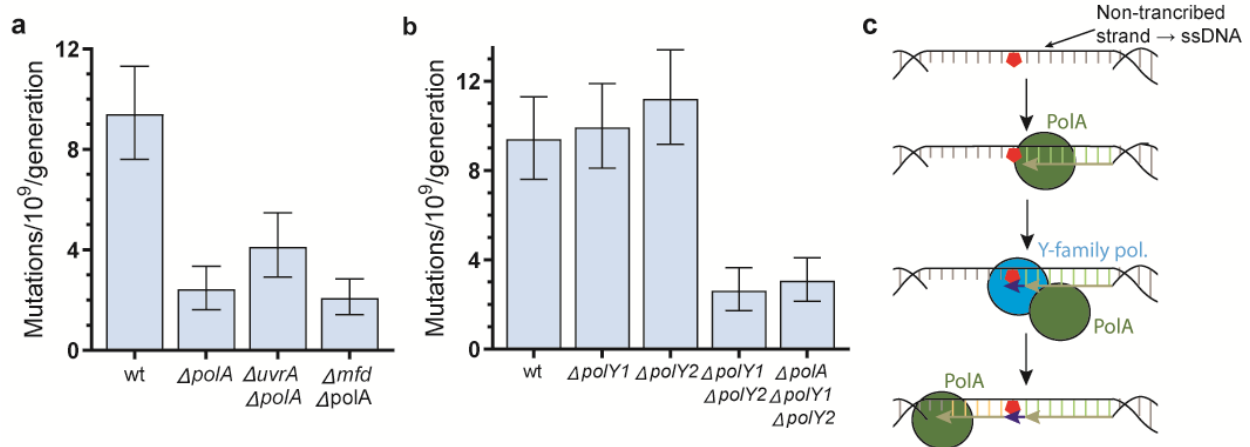

150

151 **Figure 2: a, b** Mutation rates of *B. subtilis* strains. n=54 (wt), 40 (Δ*polA*), 36 (Δ*uvrA* Δ*polA*), 44 (Δ*mfd*  
152 Δ*polA*), 57 (Δ*polY1*), 56 (Δ*polY2*), 35 (Δ*polY1* Δ*polY2*), 43 (Δ*polA* Δ*polY1* Δ*polY2*). c) Model for the  
153 molecular mechanism of NER-dependent mutagenesis. Due to DNA being single stranded in the  
154 transcription bubble and/or during NER, the non-transcribed strand is prone to damage that stalls PolA  
155 and leads to the recruitment of Y-family polymerases, further increasing the possibility of acquiring a  
156 mutation. Error bars are 95% confidence intervals.

157

158 However, *in vitro* studies with the *E. coli* ortholog of PolA (PolII) have determined that it is a  
159 high-fidelity polymerase, making it unlikely that by itself, it would introduce an error in such a  
160 small gap as the one generated during NER<sup>14</sup>. Given that previous work has suggested that *B.*  
161 *subtilis* PolA interacts with two error-prone, Y-family polymerases, PolY1 and PolY2 (orthologs  
162 of the *E. coli* DinB and UmuC and the mammalian Pol kappa and Pol eta)<sup>15</sup>, we reasoned that  
163 these Y-family polymerases could also be involved in the pro-mutagenic nature of NER. To test  
164 our model, we generated strains that lacked either PolY1, PolY2, or both polymerases. When we  
165 determined the mutation rates of strains that either lacked PolY1 or PolY2, we didn't observe a

166 decrease in mutation rates in either single mutant. Interestingly we did observe a decrease in  
167 mutation rates in strains lacking both PolY1 and PolY2, suggesting a redundant, pro-mutagenic  
168 role for these polymerases (Fig 2B). If our hypothesis that these polymerases cooperate with  
169 PolA during the NER gap filling step is correct, then in strains that lack all three polymerases,  
170 we should not observe any additional decrease in mutation rates. Indeed, we observed that there  
171 was no additional decrease in mutation rates when cells lacked all three polymerases compared  
172 to cells either lacking only PolA, the Uvr proteins, or both PolY1 PolY2 (Fig 2B and Extended  
173 Data Fig 1B). Therefore, we conclude that these polymerases are in the same pathway and  
174 cooperate to complete the last step during NER.

175 The observed requirement for both an A-family replicative polymerase and a Y-family  
176 polymerase led us to the hypothesis that PolA performs DNA synthesis during NER, but that it  
177 often stalls at a DNA lesion that is present on the opposite strand to the original lesion that was  
178 excised. This stalled PolA would then recruit a Y-family polymerase to overcome this lesion,  
179 further increasing the chances of generating a mutation. More specifically, this DNA lesion  
180 would be on the NER template strand, which is the non-transcribed strand. Therefore, it is  
181 possible that the origin of this secondary damage stems from the non-transcribed strand being  
182 single stranded during transcription and/or NER, which would make it more susceptible to DNA  
183 lesions (Fig 2C)<sup>16,17</sup>.

184 To test this model, we again turned to our biochemical assay where we used purified PolA and  
185 measured DNA synthesis on a template where we introduced an abasic site on the opposite  
186 strand to that which is removed by the NER protein UvrD. We observed that an abasic site, one  
187 the most common lesions observed in DNA<sup>18</sup>, is a strong block to synthesis by PolA<sup>9</sup> (Extended  
188 data Fig 1C), supporting the model that PolA alone cannot fill in a gap generated during NER  
189 that has damage on the non-transcribed strand. To complete gap-filling at this stage, Y-family  
190 polymerases are most likely required, consistent with the results described above.

## 191 **Oxidative stress drives NER-dependent evolution**

192 In this study, all mutation rates and evolution assays were performed in the absence of  
193 exogenous DNA damage. Thus, we wondered what the endogenous source of DNA damage  
194 behind NER mutagenesis is that damages the non-transcribed strand. Because oxidative damage  
195 is considered the most common endogenous form of DNA damage<sup>19</sup>, and it damages ssDNA  
196 much more efficiently than dsDNA<sup>16,17</sup>, we tested if oxidative DNA damage is responsible for  
197 NER being pro-mutagenic and a strong driver of evolution.

198 To test our model, we performed evolution assays where we decreased the levels of oxidative  
199 stress that the cells experience using two different methods. First, we performed evolution assays  
200 in the presence of the antioxidant thiourea. This is an antioxidant molecule that has been used in  
201 the past to reduce oxidative stress in bacteria<sup>20-22</sup>. We used concentrations that do not affect the  
202 growth rate of our strains (Extended Data Fig 2A). We observed a marked decrease in the rate of  
203 evolution of wild-type cells to various antibiotics when thiourea was present in the media (Fig.  
204 3A, Extended Data Figure 2B). To confirm that the effect we observed was not simply due to  
205 some artifact generated by thiourea, we also made a *B. subtilis* strain that overexpresses *kata*, the

206 gene that codes for the vegetative catalase, which breaks down hydrogen peroxide<sup>23</sup>. Similar to  
207 the results we obtained with thiourea, we observed a decrease in the rate of evolution to the  
208 antibiotic rifampicin (Fig. 3A). These results together strongly suggest that oxidative DNA  
209 damage is indeed driving evolution.

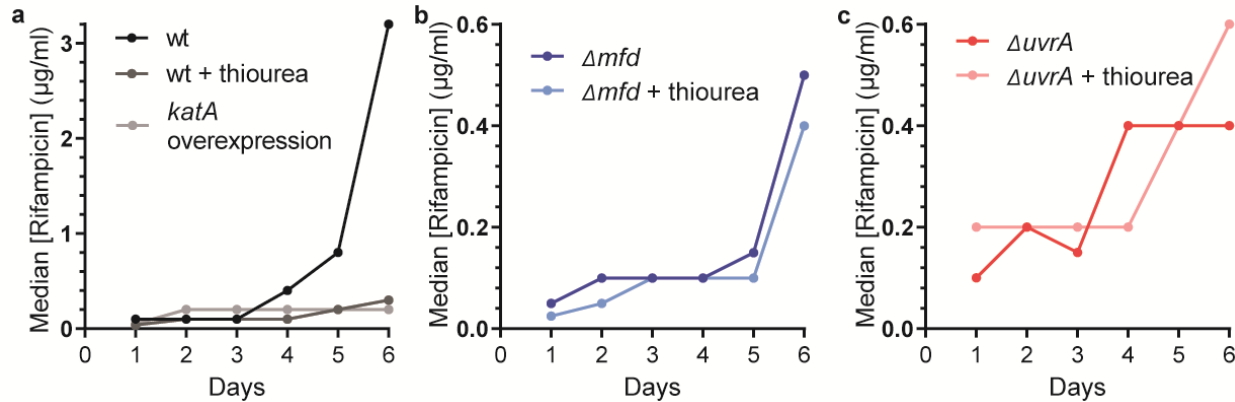

210

211 **Figure 3: a, b, c)** Median rifampicin concentration that allows for growth in the indicated strains at each  
212 sampled timepoint. 50 mM thiourea was included in the media where indicated. 1mM IPTG was added  
213 for *katA* overexpression. n=23 (wt - thiourea), 12 (wt + thiourea), 12 ( $\Delta mfd$  - thiourea), 12 ( $\Delta mfd$  +  
214 thiourea), 24 ( $\Delta uvrA$  - thiourea), 12 ( $\Delta uvrA$  + thiourea) biological replicates.

215

216 For both thiourea and *katA* overexpression, the decrease in the rate of evolution was similar to  
217 those observed in strains lacking NER proteins. We therefore tested whether oxidative damage is  
218 responsible for the mutagenic nature of NER. We performed evolution assays in strains deficient  
219 in NER genes (*uvrA* nulls and *mfd* nulls). Although these strains have a serious deficiency in  
220 evolving resistance to antibiotics, towards the end of the evolution assays, a slight increase in  
221 their MIC can be observed (Fig. 3B, C). We took advantage of this and analyzed the rate at  
222 which evolution starts to take off at the last time points when oxidative stress is reduced.  
223 Consistent with our model, we observed that, in strains lacking Mfd, or the NER proteins, or  
224 both, thiourea didn't have any effect on the rate of evolution. This strongly suggests that NER  
225 mutagenesis and subsequent adaptive evolution depends on endogenous oxidative stress.

226 Last, to determine whether this was a conserved mechanism, we performed evolution assays in  
227 patient derived strains of *Pseudomonas aeruginosa* (CF127)<sup>24</sup> and multidrug resistant  
228 *Staphylococcus aureus* (MRSA). Again, we performed evolution assays, with and without  
229 thiourea, at a concentration that again doesn't affect the growth rate of these bacterial species  
230 (Extended Data Fig 2C, D). Consistent with our observations in *B. subtilis*, we found that in  
231 these other species, there was a significant decrease in the rate of evolution when thiourea was  
232 included in the media (Fig 4A, B). This effect is particularly striking in the case of the MRSA  
233 strain, for which the concentration of antibiotic in which it could survive increased  $\approx 250,000X$   
234 (Fig 4B) in the absence of thiourea. This increase was 32X for *B. subtilis* (Fig 3A) and  $\approx 250X$   
235 for *P. aeruginosa* (Fig 4A).



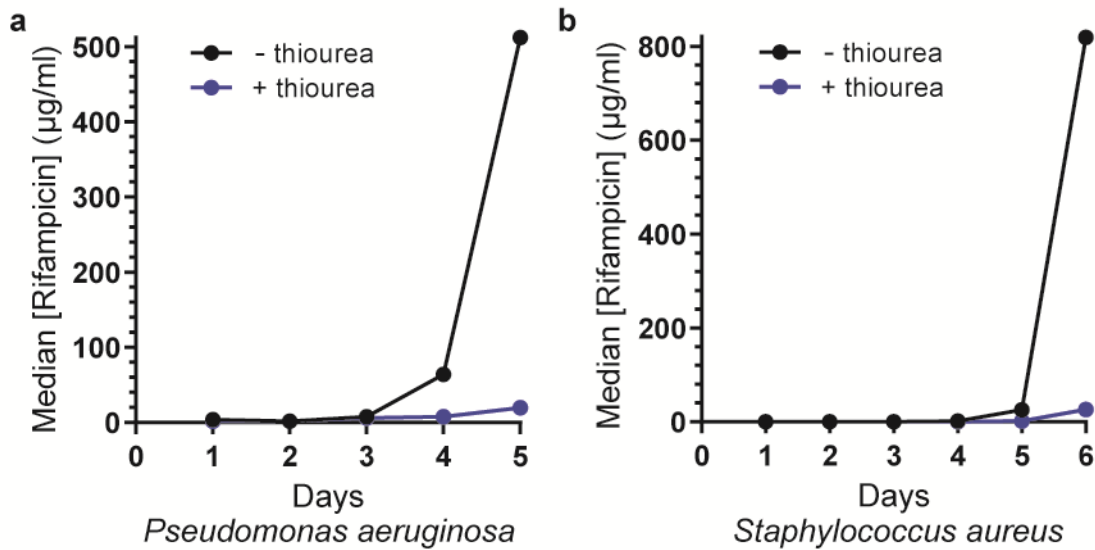

236

237 **Figure 4: a, b** Median rifampicin concentration that allows for growth in *Pseudomonas aeruginosa*  
238 (CF127) (a) and *Staphylococcus aureus* (b) at each sampled timepoint. 10 mM (*P. aeruginosa*) or 50 mM  
239 (*S. aureus*) thiourea was included in the media where indicated. n=12 biological replicates for all strains.

240

## 241 Discussion

242 We have shown that nucleotide excision repair (NER), which strongly suppresses mutagenesis in  
243 cells exposed to DNA damaging agents<sup>3,4</sup>, is actually promoting mutagenesis under endogenous  
244 conditions and is generally a pro-mutagenic mechanism. Bacteria lacking any one of the three  
245 core components of the NER mechanism, UvrABC, have lower mutation rates than wild-type  
246 cells, indicating that NER causes spontaneous mutations (Fig. 1A, C). In addition, our data  
247 indicate that all mutagenic NER functions in the same pathway as the transcription-coupled (TC)  
248 NER factor Mfd, suggesting that NER is universally transcription dependent, at least under  
249 endogenous conditions (Fig. 1B). This is consistent with recent biochemical findings regarding  
250 NER and transcription and brings into question whether GG-NER is a mechanism that exists<sup>10</sup>.

251 Interestingly, our data show that it is the cooperative nature of at least two DNA polymerases  
252 that causes NER-dependent mutations: the replicative polymerase commonly associated with  
253 NER, PolA, and one of two redundant Y-family polymerases, PolY1 and PolY2 (Fig. 2A-C,  
254 Extended Data Fig 1C). We propose that DNA damage in the NER template strand (the non-  
255 coding strand, Fig 2C) explains this requirement for both DNA polymerases to complete NER,  
256 which will naturally lead to an increased likelihood of mutations being introduced into the  
257 synthesized DNA gap. This DNA lesion would be independent of the lesion that triggered NER,  
258 and we propose that it is caused during transcription and NER, as the non-transcribed strand  
259 stays as ssDNA for an extended period of time during both processes and it is well-known that  
260 ssDNA is more prone to damage than dsDNA<sup>16,17</sup>.

261 There is a potential alternative model: the NER machinery has been shown to excise non-  
262 damaged DNA *in vitro*<sup>25</sup> and that transcription stimulates this process *in vivo*<sup>26</sup>. These gratuitous  
263 repair events, even if much less efficient than excision of damaged DNA, are predicted to be a  
264 common phenomenon, as the amount of non-damaged DNA outweighs the amount of damaged  
265 DNA by several orders of magnitude in cells that are not exposed to exogenous DNA damaging  
266 agents<sup>27</sup>. Moreover, Mfd has been found bound to DNA throughout the genome in the absence of  
267 exogenous DNA damage<sup>28,29</sup>, and it plays a role in transcription that is independent of its role in  
268 TC-NER<sup>30</sup>. This constitutive association with DNA and RNAP could lead to excision, fill in  
269 synthesis, and therefore increasing the likelihood of mutations being introduced onto undamaged  
270 DNA.

271 Interestingly, a recent pre-print has proposed that DNA lesions that are in close proximity and on  
272 different strands lead to mutagenic NER, using a mouse liver cancer model in which cells are  
273 exposed to high levels of the DNA damaging agent diethylnitrosamine<sup>31</sup>. Moreover, NER has  
274 been found to be pro-mutagenic in stationary phase yeast cells irradiated with UV light<sup>32-35</sup>.  
275 Several models have been proposed that could explain this, including damage to both strands of  
276 the DNA, which is supported by the requirement of proteins involved in error-prone bypass of  
277 DNA damage in NER-dependent mutagenesis<sup>36</sup>. These findings, together with our results,  
278 suggest that the mechanism of NER-induced mutagenesis is conserved from bacteria to  
279 mammals. Our findings add an additional piece of information: NER is universally coupled to  
280 transcription.

281 Last, we identify endogenous oxidative stress as the main source of NER-dependent mutagenesis  
282 and evolution. Oxidative stress is an obligatory consequence of aerobic life, and it results from  
283 an imbalance of reactive oxygen species. Reactive oxygen species have been shown to lead to  
284 most spontaneous mutagenesis in *E. coli*<sup>37</sup> and are thought to be an important source of  
285 endogenous DNA damage<sup>38</sup>. We tested the contribution of oxidative stress to mutagenesis by  
286 measuring the evolution of resistance to antibiotics in cells that were grown in the presence or  
287 absence of thiourea, an antioxidant that has been shown to reduce oxidative stress in bacteria<sup>20</sup>.  
288 We observed that the evolution of antibiotic resistance was much slower when thiourea was  
289 present in the media for both *B. subtilis* and patient-derived pathogenic strains of *P. aeruginosa*  
290 and MRSA (Fig 3A, Fig 4), indicating that oxidative stress drives evolution. Moreover, we  
291 observed a similar effect when we overexpress the vegetative catalase *kata* (Fig. 3A), which  
292 breaks down hydrogen peroxide, a molecule that can't itself react with DNA, but that can react  
293 with free cellular iron which oxidizes DNA<sup>38</sup>. Interestingly we observed that the little evolution  
294 we observe in NER deficient strains is *not* diminished in the presence of thiourea, supporting our  
295 model that NER-dependent mutagenesis is mostly due to lesions caused by oxidative stress. This  
296 is consistent with the mutagenic footprint of NER observed in mammalian cells<sup>31</sup>. Therefore, in  
297 addition to showing that NER is universally mutagenic and transcription-associated in bacteria,  
298 our findings likely explain the main source of NER-dependent mutagenesis not only in bacteria,  
299 but also in higher eukaryotes.

300

301

302 **References**

- 303 1. Hershberg, R. Mutation—The Engine of Evolution: Studying Mutation and Its Role in the  
304 Evolution of Bacteria. *Cold Spring Harbor Perspectives in Biology* **7**, a018077 (2015).
- 305 2. Ragheb, M. N. *et al.* Inhibiting the Evolution of Antibiotic Resistance. *Molecular Cell* **73**,  
306 157-165.e5 (2019).
- 307 3. Ishii, Y. & Kondo, S. Comparative analysis of deletion and base-change mutabilities of  
308 Escherichia coli B strains differing in DNA repair capacity (Wild-type, *uvrA*-, *pola*-, *reca*-) by  
309 various mutagens. *Mutation Research/Fundamental and Molecular Mechanisms of*  
310 *Mutagenesis* **27**, 27–44 (1975).
- 311 4. Fabisiewicz, A. & Janion, C. DNA mutagenesis and repair in UV-irradiated E. coli K-12  
312 under condition of mutation frequency decline. *Mutation Research/Fundamental and*  
313 *Molecular Mechanisms of Mutagenesis* **402**, 59–66 (1998).
- 314 5. Kisker, C., Kuper, J. & van Houten, B. Prokaryotic Nucleotide Excision Repair. *Cold Spring*  
315 *Harbor Perspectives in Biology* **5**, a012591–a012591 (2013).
- 316 6. Hanawalt, P. C. & Spivak, G. Transcription-coupled DNA repair: Two decades of progress  
317 and surprises. *Nature Reviews Molecular Cell Biology* vol. 9 958–970 (2008).
- 318 7. Epshtein, V. *et al.* UvrD facilitates DNA repair by pulling RNA polymerase backwards.  
319 *Nature* **505**, 372–377 (2014).
- 320 8. Adebali, O., Chiou, Y.-Y., Hu, J., Sancar, A. & Selby, C. P. Genome-wide transcription-  
321 coupled repair in *Escherichia coli* is mediated by the Mfd translocase. *Proceedings of the*  
322 *National Academy of Sciences* **114**, (2017).
- 323 9. Martinez, B., Bharati, B. K., Epshtein, V. & Nudler, E. Pervasive Transcription-coupled DNA  
324 repair in E. coli. *Nature Communications* **13**, 1702 (2022).
- 325 10. Bharati, B. K. *et al.* Crucial role and mechanism of transcription-coupled DNA repair in  
326 bacteria. *Nature* **604**, 152–159 (2022).
- 327 11. Ross, C. *et al.* Novel role of *mfd*: Effects on stationary-phase mutagenesis in *Bacillus*  
328 *subtilis*. *Journal of Bacteriology* **188**, 7512–7520 (2006).
- 329 12. Gómez-Marroquín, M. *et al.* Stationary-phase mutagenesis in stressed *Bacillus subtilis*  
330 cells operates by Mfd-dependent mutagenic pathways. *Genes (Basel)* **7**, (2016).
- 331 13. Luria, S. E. & Delbrück, M. Mutations of Bacteria From Virus Sensitivity To Virus  
332 Resistance. *Genetics* **28**, 491–511 (1943).
- 333 14. Kuchta, R. D., Benkovic, P. & Benkovic, S. J. Kinetic mechanism whereby DNA polymerase I  
334 (Klenow) replicates DNA with high fidelity. *Biochemistry* **27**, 6716–6725 (1988).
- 335 15. Duigou, S., Ehrlich, S. D., Noirot, P. & Noirot-Gros, M.-F. DNA polymerase I acts in  
336 translesion synthesis mediated by the Y-polymerases in *Bacillus subtilis*. *Molecular*  
337 *Microbiology* **57**, 678–690 (2005).

- 338 16. Degtyareva, N. P. *et al.* Oxidative stress-induced mutagenesis in single-strand DNA occurs  
339 primarily at cytosines and is DNA polymerase zeta-dependent only for adenines and  
340 guanines. *Nucleic Acids Research* **41**, 8995–9005 (2013).
- 341 17. Degtyareva, N. P. *et al.* Mutational signatures of redox stress in yeast single-strand DNA  
342 and of aging in human mitochondrial DNA share a common feature. *PLoS Biology* **17**,  
343 (2019).
- 344 18. Thompson, P. S. & Cortez, D. New insights into abasic site repair and tolerance. *DNA*  
345 *Repair* **90**, 102866 (2020).
- 346 19. Imlay, J. A. Where in the world do bacteria experience oxidative stress? *Environmental*  
347 *Microbiology* **21**, 521–530 (2019).
- 348 20. Kohanski, M. A., Dwyer, D. J., Hayete, B., Lawrence, C. A. & Collins, J. J. A Common  
349 Mechanism of Cellular Death Induced by Bactericidal Antibiotics. *Cell* **130**, 797–810  
350 (2007).
- 351 21. Kohanski, M. A., DePristo, M. A. & Collins, J. J. Sublethal Antibiotic Treatment Leads to  
352 Multidrug Resistance via Radical-Induced Mutagenesis. *Molecular Cell* **37**, 311–320  
353 (2010).
- 354 22. Pribis, J. P. *et al.* Gamblers: An Antibiotic-Induced Evolvable Cell Subpopulation  
355 Differentiated by Reactive-Oxygen-Induced General Stress Response. *Molecular Cell* **74**,  
356 785-800.e7 (2019).
- 357 23. Bol, D. K. & Yasbin, R. E. Analysis of the dual regulatory mechanisms controlling expression  
358 of the vegetative catalase gene of *Bacillus subtilis*. *Journal of Bacteriology* **176**, 6744–6748  
359 (1994).
- 360 24. Wolfgang, M. C. *et al.* Conservation of genome content and virulence determinants  
361 among clinical and environmental isolates of *Pseudomonas aeruginosa*. *Proc Natl Acad Sci*  
362 *U S A* **100**, 8484–8489 (2003).
- 363 25. Branum, M. E., Reardon, J. T. & Sancar, A. DNA Repair Excision Nuclease Attacks  
364 Undamaged DNA. *Journal of Biological Chemistry* **276**, 25421–25426 (2001).
- 365 26. Hanawalt, P. C. Subpathways of nucleotide excision repair and their regulation. *Oncogene*  
366 **21**, 8949–8956 (2002).
- 367 27. Reardon, J. T. & Sancar, A. Nucleotide Excision Repair. in 183–235 (2005).  
368 doi:10.1016/S0079-6603(04)79004-2.
- 369 28. Ho, H. N., van Oijen, A. M. & Ghodke, H. The transcription-repair coupling factor Mfd  
370 associates with RNA polymerase in the absence of exogenous damage. *Nature*  
371 *Communications* **9**, 1570 (2018).
- 372 29. Ragheb, M. N., Merrikh, C., Browning, K. & Merrikh, H. Mfd regulates RNA polymerase  
373 association with hard-to-transcribe regions in vivo, especially those with structured RNAs.  
374 *Proceedings of the National Academy of Sciences* **118**, (2021).

- 375 30. Le, T. T. *et al.* Mfd Dynamically Regulates Transcription via a Release and Catch-Up  
376 Mechanism. *Cell* **172**, 344–357.e15 (2018).
- 377 31. Anderson, C. J. *et al.* Strand-resolved mutagenicity of DNA damage and repair. *Biorxiv*  
378 (2022).
- 379 32. Eckardt, F. & Haynes, R. H. Induction of pure and sectored mutant clones in excision-  
380 proficient and deficient strains of yeast. *Mutation Research/Fundamental and Molecular*  
381 *Mechanisms of Mutagenesis* **43**, 327–338 (1977).
- 382 33. James, A. P. & Kilbey, B. J. THE TIMING OF UV MUTAGENESIS IN YEAST: A PEDIGREE  
383 ANALYSIS OF INDUCED RECESSIVE MUTATION. *Genetics* **87**, 237–248 (1977).
- 384 34. James, A. P., Kilbey, B. J. & Prefontaine, G. J. The timing of UV mutagenesis in yeast:  
385 Continuing mutation in an excision-defective (rad1-1) strain. *Molecular and General*  
386 *Genetics MGG* **165**, 207–212 (1978).
- 387 35. Eckardt, F., Teh, S.-J. & Haynes, R. H. HETERODUPLEX REPAIR AS AN INTERMEDIATE STEP  
388 OF UV MUTAGENESIS IN YEAST. *Genetics* **95**, 63–80 (1980).
- 389 36. Kozmin, S. G. & Jinks-Robertson, S. The Mechanism of Nucleotide Excision Repair-  
390 Mediated UV-Induced Mutagenesis in Nonproliferating Cells. *Genetics* **193**, 803–817  
391 (2013).
- 392 37. Sakai, A., Nakanishi, M., Yoshiyama, K. & Maki, H. Impact of reactive oxygen species on  
393 spontaneous mutagenesis in *Escherichia coli*. *Genes to Cells* **11**, 767–778 (2006).
- 394 38. Imlay, J. A. The molecular mechanisms and physiological consequences of oxidative stress:  
395 lessons from a model bacterium. *Nature Reviews Microbiology* **11**, 443–454 (2013).

396

## 397 **Methods**

### 398 **Bacterial culture**

399 *Bacillus subtilis*, *Salmonella enterica* serovar Typhimurium, and *Staphylococcus aureus* were  
400 cultured in lysogeny broth (LB), and *Pseudomonas aeruginosa* in LB with 0.1% tween 20 (when  
401 liquid media). Bacterial plates were grown overnight at 37 °C unless otherwise indicated with the  
402 following antibiotics when appropriate: 500 µg/ml erythromycin and 12.5 mg/ml lincomycin  
403 (MLS), 5 µg/ml (*B. subtilis*) or 50 µg/ml (*E. coli* and *S. enterica*) kanamycin, 25 µg/ml  
404 chloramphenicol and 100 µg/ml carbenicillin. When grown in liquid media, cultures were started  
405 from single colonies and were grown with aeration (260 rpm).

### 406 **Strain construction**

407 The parental strain for all *B. subtilis* strains used in this study is HM1 (same as AG174,  
408 originally named JH642)<sup>39,40</sup>. Gene deletions that are marked with MLS or kanamycin resistance  
409 were obtained from<sup>41</sup>. Genotypes for all strains used can be found in Extended Data Table 1.  
410 Genomic DNA from these strains was purified with the GeneJET Genomic DNA Purification Kit

411 (Thermo) following the manufacturer's instructions and transformed into the HM1 background  
412 as in previously described<sup>42</sup>. When necessary to make strains that carry multiple mutations, these  
413 antibiotic resistant cassettes were excised by transforming the strains with a plasmid expressing  
414 the Cre recombinase (pDR244, BGSCID: ECE274) purified from RecA+ *Escherichia coli* (NEB)  
415 cells with the GeneJET Plasmid Miniprep Kit (Thermo), generating markerless strains<sup>41</sup>.  
416 Recombinants containing markerless strains were checked by PCR (Extended Data Table 2).

417 The *S. enterica* Typhimurium strain is SL1344<sup>43</sup> and was a gift from Mariana Byndloss  
418 (Vanderbilt University), the *Pseudomonas aeruginosa* strain is CF127<sup>24</sup> and was a gift from Matt  
419 Parsek (University of Washington) and the multidrug-resistant *Staphylococcus aureus* strain is a  
420 cystic fibrosis patient derived strain obtained from the Vanderbilt University Medical Center.

421 For *kataA* overexpression, the coding sequence of the *kataA* gene was amplified using Q5  
422 polymerase (NEB) (Extended data Table 2) and cloned between the *HindIII* and the *NheI* sites in  
423 pCAL838<sup>44</sup> to form pHM724. pHM724 DNA obtained from RecA+ *Escherichia coli* cells was  
424 transformed into HM1 cells. Cells were plated on MLS containing plates and after overnight  
425 incubation at 37 °C, MLS resistant colonies were tested for growth in media lacking threonine.  
426 Colonies that lack growth in threonine less media and were MLS resistant were selected as  
427 integrants.

428 For *S. enterica*, knock outs were made by recombineering as previously described<sup>45</sup> using the  
429 pSIM27 plasmid, a gift from the Court lab ([https://redrecombineering.ncifcrf.gov/strains--  
430 plasmids.html](https://redrecombineering.ncifcrf.gov/strains--plasmids.html)). In short, for knocking out *mfd*, the chloramphenicol resistance gene was  
431 amplified from the pKD3 plasmid (a gift from the Wanner lab<sup>46</sup>) while adding 40 nucleotides of  
432 homology upstream of the start site and downstream of the stop codon using Q5 polymerase  
433 (Extended Data Table 2). The PCR amplicon was cleaned and electroporated into competent, wt  
434 cells harboring the pSIM27 plasmid. Chloramphenicol resistant colonies were selected and  
435 checked by PCR (Extended Data Table 2). For knocking out *uvrB*, the kanamycin resistance  
436 gene was amplified from an *E. coli* strain with this gene on its chromosome (Extended Data  
437 Table 2).

#### 438 **Determination of the mutation rates by fluctuation assays**

439 Mutations rates were calculated as previously described<sup>2</sup>. A single colony was inoculated into 2  
440 ml of LB and grown for 2 hours (*B. subtilis*) or 2.5 hour (*S. enterica*) to reach exponential  
441 growth ( $0.1 < OD < 0.6$ ). This culture was diluted to an OD of 0.0005 and between 3 and 10  
442 parallel cultures with 2 ml of LB were grown for 4.5 hours. Then, 1.5 ml of cells were pelleted  
443 and plated on 50 ug/ml rifampicin containing plates. The remaining cells were serially diluted in  
444 1X Spizizen media and plated on antibiotic free media to quantify total viable cells. Colonies  
445 were counted after 24 hours at 37 °C (rifampicin plates) or 16 hours at 30 °C (no antibiotic  
446 plates). Mutation rates were calculated by using the Fluctuation AnaLysis CalculatOR<sup>47</sup>,  
447 utilizing the Ma-Sandri-Sarkar maximum likelihood method.

#### 448 **Evolution assays**

449 Evolution assays were performed as previously described<sup>2</sup>. A single colony of the indicated  
450 species and genotype was grown until and OD of 1-2 was reached. Culture was then diluted to  
451 and OD of 0.01 in culture media and grown in 7 different concentrations of the indicated  
452 antibiotic, ranging from no antibiotic to 16X the minimal inhibitory concentration (MIC), as well  
453 as thiourea when indicated. Cells were grown for 24 hours at 37 °C with aeration, after which the  
454 OD was measured. The culture with the highest antibiotic concentration that showed an OD  
455 larger than 0.5X the OD of the culture without antibiotic (or, in the case of *P. aeruginosa*, an  
456 OD>0.3) was diluted 100X to an OD of approximately 0.01 and again grown in 7 different  
457 antibiotic concentrations. This process was repeated 6 times for *B. subtilis* and *S. aureus* or 5  
458 times for *P. aeruginosa*.

#### 459 **Growth curves**

460 Growth curves were determined by growing a single colony of the indicated species until and  
461 OD of 1-2 was reached. The culture was diluted to an OD of 0.01 in culture media and growth in  
462 an Epoch microplate spectrophotometer (BioTek) at 37 °C for 16 hours. OD600 was measured  
463 every 10 mins.

#### 464 **PolA purification**

465 The coding sequence of PolA without the start codon was amplified by PCR using Q5  
466 polymerase (NEB) and cloned BamHI-XhoI into pET28a (Thermo) to generate an N-terminal 6X  
467 his tagged protein coding sequence. The plasmid was transformed into BL21(DE) cells (NEB),  
468 and a single colony was inoculated into 70 ml of LB and grown overnight in LB containing  
469 kanamycin. 10 ml of culture were then inoculated in 1 L of LB+kanamycin and grown until an  
470 OD600 of 0.6, when 1 mM IPTG was added to the media. Cells were grown for 4 hours and  
471 centrifuged for 15 mins at 4000G. Pellets were resuspended in 30 ml of CellLytic B cell lysis  
472 reagent (Sigma) with 3 µl of Benzonase (Sigma) and 10 mM imidazole and shaken at RT for 10  
473 mins. Lysate was centrifuged at 20000G at 4 °C and the supernatant was mixed with an equal  
474 volume of equilibration buffer (20 mM sodium phosphate pH 7.4, 300 mM sodium chloride, 10  
475 mM imidazole), and run twice through 15 ml of equilibrated HisPur™ Ni-NTA Resin (Thermo)  
476 at 4 °C. Resin was washed with 150 ml of wash buffer (20 mM sodium phosphate pH 7.4, 300  
477 mM sodium chloride, 40 mM imidazole) and eluted with 15 ml of elution buffer (20 mM sodium  
478 phosphate pH 7.4, 300 mM sodium chloride, 150 mM imidazole). Protein was dialyzed with a 30  
479 ml Slide-A-Lyzer Dialysis Cassette G2 20000 MWCO (Thermo) against 10 mM tris pH 8, 50  
480 mM NaCl, 5% glycerol, 0.1 mM DTT, 0.1 mM EDTA for 3 hours at RT. Protein prep was then  
481 concentrated with Amicon Ultra-15 Centrifugal Filter Units 3000K (Millipore) to a final  
482 concentration of 1.6 mg/ml measured by Bradford assay (Thermo). PolA prep was run on a 10%  
483 SDS-PAGE and stained by Imperial protein stain (Thermo) to confirm purity of purified enzyme.

#### 484 **PolA synthesis assay**

485 PolA synthesis was tested on 40 mM Tris pH 8, 10 mM MgCl<sub>2</sub>, 60 mM KCl, 2.5% glycerol  
486 buffer containing 1 mM dNTPs, 1.5 nM of the indicated DNA substrate labeled with Cy5, and  
487 100 nM PolA. 10 ul reactions were incubated at 37 °C for 30 mins and stopped with 10 ul of

488 95% formamide 10 mM EDTA. DNA was denatured at 85 °C for 15 mins and run in a 12% urea  
489 denaturing gel at 150V for 30 mins. Gel was scanned in a ChemiDoc imaging system (BioRad).

490 The substrates for PolA synthesis experiments were done by annealing three (gap substrate) or  
491 two (abasic site substrate) HPLC purified oligos (Sigma) in a thermocycler. The template for the  
492 abasic site substrate contained a deoxyuracil in the 9th position. The abasic site was generated by  
493 treating the annealed oligo with hSMUG1 (NEB) for 30 mins at 37 °C followed by heat  
494 inactivation of the enzyme at 65 °C for 20 mins.

## 495 **Methods references**

- 496 39. Brehm, S. P., Staal, S. P. & Hoch, J. A. Phenotypes of Pleiotropic-Negative Sporulation Mutants of  
497 *Bacillus subtilis*. *Journal of Bacteriology* **115**, 1063–1070 (1973).
- 498 40. Smith, J. L., Goldberg, J. M. & Grossman, A. D. Complete Genome Sequences of *Bacillus subtilis*  
499 subsp. *subtilis* Laboratory Strains JH642 (AG174) and AG1839. *Genome Announcements* **2**, (2014).
- 500 41. Koo, B.-M. *et al.* Construction and Analysis of Two Genome-Scale Deletion Libraries for *Bacillus*  
501 *subtilis*. *Cell Systems* **4**, 291-305.e7 (2017).
- 502 42. Harwood, C. R. & Cutting, S. M. *Molecular biological methods for Bacillus*. (Wiley, 1990).
- 503 43. Hoiseth, S. K. & Stocker, B. A. D. Aromatic-dependent *Salmonella typhimurium* are non-virulent  
504 and effective as live vaccines. *Nature* **291**, 238–239 (1981).
- 505 44. Leonetti, C. T. *et al.* Critical Components of the Conjugation Machinery of the Integrative and  
506 Conjugative Element ICE *Bs1* of *Bacillus subtilis*. *Journal of Bacteriology* **197**, 2558–2567 (2015).
- 507 45. Thomason, L. C., Sawitzke, J. A., Li, X., Costantino, N. & Court, D. L. Recombineering: Genetic  
508 Engineering in Bacteria Using Homologous Recombination. *Current Protocols in Molecular Biology*  
509 **106**, (2014).
- 510 46. Datsenko, K. A. & Wanner, B. L. One-step inactivation of chromosomal genes in *Escherichia coli* K-  
511 12 using PCR products. *Proceedings of the National Academy of Sciences* **97**, 6640–6645 (2000).
- 512 47. Hall, B. M., Ma, C.-X., Liang, P. & Singh, K. K. Fluctuation AnaLysis CalculatOR: a web tool for the  
513 determination of mutation rate using Luria-Delbruck fluctuation analysis. *Bioinformatics* **25**,  
514 1564–1565 (2009).

## 515 **Acknowledgements**

516 We would like to thank current and former Merrikh Lab members for helpful discussion,  
517 especially Anna Johnson.

## 518 **Author Contributions and Affiliations**

519 JCG ANS and AJHV performed experiments. JCG and ANS analyzed data. JCG created figures.  
520 JCG and HM wrote the manuscript. HM directed the project.

## 521 **Competing interest declaration**



522 The authors declare no conflict of interest

523 **Funding sources**

524 This work was supported by the NIH R01-AI-127422 and NIH R01-GM-127593 to HM.

525 **Extended data**

526 Extended Data Table 1: Strains used

| Strain | Species            | Genotype                                               | Reference                | Figure      |
|--------|--------------------|--------------------------------------------------------|--------------------------|-------------|
| HM1    | <i>B. subtilis</i> | wt                                                     | Brehm 1973               | 1, 2, 3, S2 |
| HM2521 | <i>B. subtilis</i> | <i>mfd::MLS</i>                                        | Million-Weaver 2015      | 1,3         |
| HM2633 | <i>B. subtilis</i> | <i>uvrA::MLS</i>                                       | This study               | 1,3         |
| HM2634 | <i>B. subtilis</i> | <i>uvrB::MLS</i>                                       | This study               | 1           |
| HM2635 | <i>B. subtilis</i> | <i>uvrC::MLS</i>                                       | This study               | 1           |
| HM2472 | <i>B. subtilis</i> | <i>mfd::markerless</i><br><i>uvrA::MLS</i>             | This study               | 1           |
| HM2473 | <i>B. subtilis</i> | <i>mfd::markerless</i><br><i>uvrB::MLS</i>             | This study               | 1           |
| HM2474 | <i>B. subtilis</i> | <i>mfd::markerless</i><br><i>uvrC::MLS</i>             | This study               | 1           |
| HM4315 | <i>S. enterica</i> | wt                                                     | Hoiseth and Stocker 1981 | 1           |
| HM4500 | <i>S. enterica</i> | <i>mfd::Cm</i>                                         | This study               | 1           |
| HM4510 | <i>S. enterica</i> | <i>uvrB::Kan</i>                                       | This study               | 1           |
| HM3533 | <i>B. subtilis</i> | <i>polA::MLS</i>                                       | This study               | 2           |
| HM4449 | <i>B. subtilis</i> | <i>uvrA::markerless</i><br><i>polA::MLS</i>            | This study               | 2           |
| HM3550 | <i>B. subtilis</i> | <i>mfd::markerless</i><br><i>polA::MLS</i>             | This study               | 2           |
| HM391  | <i>B. subtilis</i> | <i>polY1::Cm</i>                                       | Million-Weaver 2015      | 2           |
| HM345  | <i>B. subtilis</i> | <i>polY2::Cm</i>                                       | Million-Weaver 2015      | 2           |
| HM2632 | <i>B. subtilis</i> | <i>polY1::MLS polY2::Cm</i>                            | This study               | 2           |
| HM3567 | <i>B. subtilis</i> | <i>polY1::markerless</i><br><i>polY2::Cm polA::MLS</i> | This study               | 2           |
| HM2666 | <i>B. subtilis</i> | <i>polY1::markerless</i><br><i>polY2::Cm uvrA::MLS</i> | This study               | S1          |
| HM2667 | <i>B. subtilis</i> | <i>polY1::markerless</i><br><i>polY2::Cm uvrB::MLS</i> | This study               | S1          |
| HM2668 | <i>B. subtilis</i> | <i>polY1::markerless</i><br><i>polY2::Cm uvrC::MLS</i> | This study               | S1          |
| HM2669 | <i>B. subtilis</i> | <i>polY1::markerless</i><br><i>polY2::Cm mfd::MLS</i>  | This study               | S1          |
| HM4488 | <i>B. subtilis</i> | <i>polY1::markerless</i><br><i>polY2::Cm</i>           | This study               | S1          |

|        |                      |                                                                                             |               |       |
|--------|----------------------|---------------------------------------------------------------------------------------------|---------------|-------|
|        |                      | <i>mfd::markerless</i><br><i>polA::MLS</i>                                                  |               |       |
| HM4482 | <i>B. subtilis</i>   | <i>polY1::markerless</i><br><i>polY2::Cm</i><br><i>uvrA::markerless</i><br><i>polA::MLS</i> | This study    | S1    |
| HM4502 | <i>B. subtilis</i>   | <i>thr::Pspank(hy) katA</i>                                                                 | This study    | 3     |
| HM2212 | <i>P. aeruginosa</i> | <i>CF127</i>                                                                                | Wolfgang 2003 | 4, S2 |
| HM4318 | <i>S. aureus</i>     | penicillin, oxacillin,<br>erythromycin resistant                                            | This study    | 4, S2 |

527

528 Extended Date Table 2: Oligonucleotides used

| PCR/substrate                 | Species            | Oligo     | Sequence (5'→3')                                                       |
|-------------------------------|--------------------|-----------|------------------------------------------------------------------------|
| <i>uvrA::markerless</i>       | <i>B. subtilis</i> | Fwd       | GGAGCTTCGCGATTTACTTTTAG                                                |
|                               |                    | Rev       | GCTTGCCTGCTAAGCCC                                                      |
| <i>mfd::markerless</i>        | <i>B. subtilis</i> | Fwd       | CGAAATCCGCATTACCACGA                                                   |
|                               |                    | Rev       | TTAGGAATCACGACCCGACC                                                   |
| <i>polY1::markerless</i>      | <i>B. subtilis</i> | Fwd       | TGTTACGGCGCTGTGTATC                                                    |
|                               |                    | Rev       | CGAATTCATGCGGAAGACTTTAC                                                |
| <i>uvrB</i><br>recombineering | <i>S. enterica</i> | Fwd       | TACACCCCTGCCGCTCACTCCTTCAGGT<br>AGCCGCTCATGTATGGACAGCAAGCGAAC<br>CG    |
|                               |                    | Rev       | CCATGGTAACGATGACTCGCTGGCGATCG<br>ACACATTGTCATCAGAAGAAGCTCGTCAAG<br>AAG |
| <i>mfd</i><br>recombineering  | <i>S. enterica</i> | Fwd       | GACGCCCGGCCTGACGCTTATGCAATAGC<br>GTTTTCTTCCAGTGTAGGCTGGAGCTGCTT<br>C   |
|                               |                    | Rev       | GTGCGGCGTAAACAAAAAGAGATACTG<br>ACAACCGTTATGCATATGAATATCCTCCT<br>TAG    |
| <i>uvrB</i> check             | <i>S. enterica</i> | Fwd       | GCAATATTCACCGTCGAGAG                                                   |
|                               |                    | Rev       | CTATTGCACTGAAATTCTCAAAAGC                                              |
| <i>mfd</i> check              | <i>S. enterica</i> | Fwd       | AGAATTTGTAAAGATTAGGCCGG                                                |
|                               |                    | Rev       | TGAAGCAGCCTGAAGGG                                                      |
| Gap substrate                 | <i>In vitro</i>    | Top left  | GCCTAGCTCTGCCATGCATA                                                   |
|                               |                    | Top right | TACACCTGTCTATCATTAGT                                                   |
|                               |                    | Bottom    | ACTAATGATAGACAGGTGTAGTACGGAA<br>ATCTTCTACGTTTATGCATGGCAGAGCTA<br>GGC   |
| Abasic site<br>substrate      | <i>In vitro</i>    | Top       | Cy5-<br>ATTCTGGTGGAATGGCGCGCTGCTAT                                     |

|                                         |                    |        |                                                        |
|-----------------------------------------|--------------------|--------|--------------------------------------------------------|
|                                         |                    | Bottom | GTGGAACGCTA[dU]ATGTGCCATATAGCA<br>GCGCGCCATTTCACCAGAAT |
| <i>polA</i> for cloning<br>into pET28a  | <i>B. subtilis</i> | Fwd    | AAGGATCCACGGAACGAAAAAATTAGT<br>GCTTGTAGAC              |
|                                         |                    | Rev    | AAGAATTCTTATTTTCGCATCGTACCAAGA<br>TGGGC                |
| <i>katA</i> for cloning<br>into pCAL838 | <i>B. subtilis</i> | Fwd    | TTAAGCTTATGAGTTCAAATAAACTGACA<br>ACTAGCTGGG            |
|                                         |                    | Rev    | TTGCTAGCTTAAGAATCTTTTTTAATCGGC<br>AATCCAAGGC           |

529

530 Extended Data Figure 1:

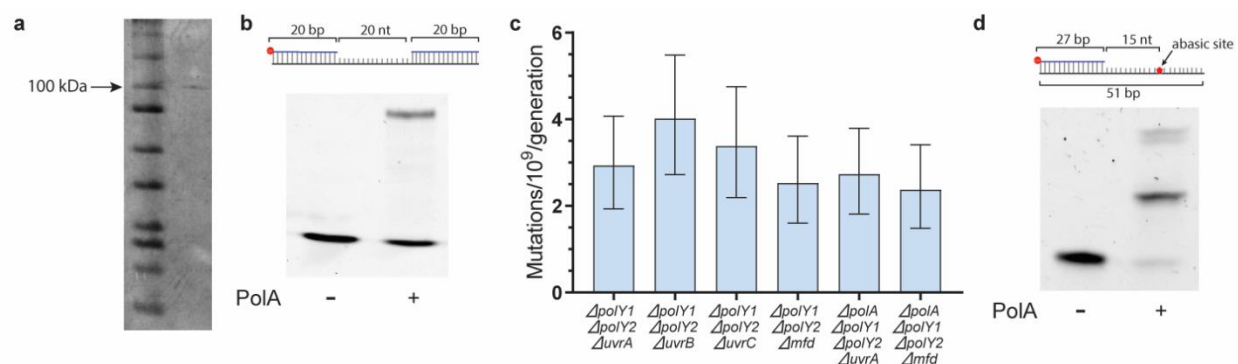

531 a) SDS-PAGE of purified *B. subtilis* PolA b) Primer extension assay with purified *B. subtilis*  
532 PolA using a gap substrate c) Mutation rates of *Bacillus subtilis* strains of the indicated genotype  
533 to rifampicin. n=40 ( $\Delta polY1 \Delta polY2 \Delta uvrA$ ), 40 ( $\Delta polY1 \Delta polY2 \Delta uvrB$ ), 30 ( $\Delta polY1 \Delta polY2$   
534  $\Delta uvrC$ ), 33 ( $\Delta polY1 \Delta polY2 \Delta mfd$ ), 36 ( $\Delta polA \Delta polY1 \Delta polY2 \Delta uvrA$ ), 36 ( $\Delta polA \Delta polY1 \Delta polY2$   
535  $\Delta mfd$ ) biological replicates. Error bars are 95% confidence intervals. d) Primer extension assay  
536 with purified *B. subtilis* PolA using a substrate including an abasic site.

537

538

539

540

541

542

543

544

545

546

547 Extended Data Figure 2

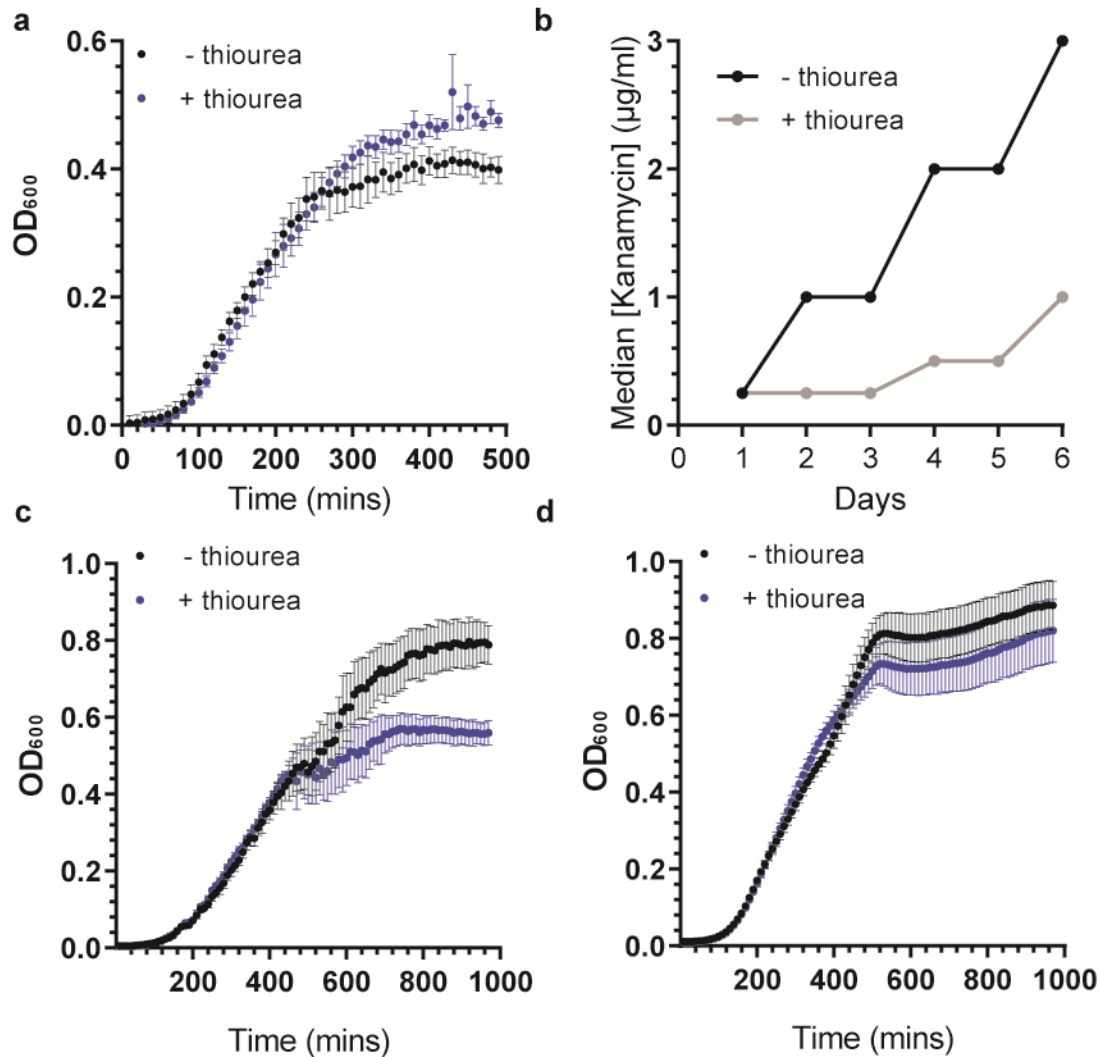

548

549 a) OD<sub>600</sub> measured every 10 mins for 490 mins of wt *B. subtilis* with and without 50 mM  
550 thiourea in the media. b) Median kanamycin concentration that allows for growth in wt cells at  
551 each sampled timepoint. 50 mM thiourea was included in the media when indicated. n=12 (-  
552 thiourea), 12 (+ thiourea) c,d) OD<sub>600</sub> measured every 10 mins for 970 mins of *P. aeruginosa* (b)  
553 and *S. aureus* (c) with and without 10 mM thiourea (*P. aeruginosa*) or 50 mM thiourea (*S.*  
554 *aureus*) in the media. n= 12 biological replicates for all three strains. Error bars indicate standard  
555 deviation.
